# Supplementary material for: Simulating lateral distraction osteogenesis
Source: PLOS journal article supplement (doi:10.1371/journal.pone.0194500), 2018-03-15

## S1 Differentiation rules

For approximating the tissue concentration rates of change we use the stand-alone fuzzy logic controller provided by MATLAB's Fuzzy Logic Toolbox (The MathWorks, Inc., Natick, MA), compiled as a shared C library with the following configuration:

| Option               | Value                                                                                                                               |
|----------------------|-------------------------------------------------------------------------------------------------------------------------------------|
| Input variables      | $c_w, c_l, c_c, c_s, c_v, s_b, s_v, \gamma_{\text{peak}}, \varepsilon_{\text{peak}}, \gamma_{\text{eff}}, \varepsilon_{\text{eff}}$ |
| Output variables     | $\Delta c_w, \Delta c_c, \Delta c_v$                                                                                                |
| Logical AND operator | min                                                                                                                                 |
| Logical OR operator  | max                                                                                                                                 |
| Logical implication  | min (Mamdani implication)                                                                                                           |
| Logical aggregation  | max                                                                                                                                 |
| Defuzzification      | Center of area                                                                                                                      |

## Linguistic rules

The fuzzy logic controller evaluates the following 27 linguistic rules to determine the values of  $\Delta c_w, \Delta c_c$  and  $\Delta c_v$ :

| Rule no. | If ...                                                                                                                                 | then ...                                                                                       |
|----------|----------------------------------------------------------------------------------------------------------------------------------------|------------------------------------------------------------------------------------------------|
| 1        | $\varepsilon_{\text{peak}}$ is negative destructive                                                                                    | $\Delta c_w$ is negative and<br>$\Delta c_c$ is negative and<br>$\Delta c_v$ is negative       |
| 2        | $\varepsilon_{\text{peak}}$ is positive destructive                                                                                    | $\Delta c_w$ is negative and<br>$\Delta c_c$ is negative and<br>$\Delta c_v$ is negative       |
| 3        | $\gamma_{\text{peak}}$ is very high                                                                                                    | $\Delta c_w$ is negative and<br>$\Delta c_c$ is negative and<br>$\Delta c_v$ is negative       |
| 4        | $\varepsilon_{\text{peak}}$ is not negative destructive                                                                                | $\Delta c_w$ is about zero and<br>$\Delta c_c$ is about zero and<br>$\Delta c_v$ is about zero |
| 5        | $\varepsilon_{\text{peak}}$ is not positive destructive                                                                                | $\Delta c_w$ is about zero and<br>$\Delta c_c$ is about zero and<br>$\Delta c_v$ is about zero |
| 6        | $c_v$ is low and<br>$s_v$ is not low and<br>$\varepsilon_{\text{peak}}$ is not negative high and<br>$\gamma_{\text{peak}}$ is not high | $\Delta c_v$ is positive                                                                       |

|    |                                                                                                                                                           |                          |
|----|-----------------------------------------------------------------------------------------------------------------------------------------------------------|--------------------------|
| 7  | $c_v$ is medium and<br>$s_v$ is not low and<br>$\varepsilon_{\text{peak}}$ is not negative high and<br>$\gamma_{\text{peak}}$ is not high                 | $\Delta c_v$ is positive |
| 8  | $c_v$ is high and<br>$\varepsilon_{\text{peak}}$ is not negative high and<br>$\gamma_{\text{peak}}$ is not high                                           | $\Delta c_v$ is positive |
| 9  | $c_c$ is low and<br>$c_v$ is high and<br>$s_v$ is high and<br>$\varepsilon_{\text{eff}}$ is negative medium<br>$\gamma_{\text{eff}}$ is medium            | $\Delta c_w$ is positive |
| 10 | $c_c$ is low and<br>$c_v$ is high and<br>$s_v$ is high and<br>$\varepsilon_{\text{eff}}$ is positive medium<br>$\gamma_{\text{eff}}$ is medium            | $\Delta c_w$ is positive |
| 11 | $c_b$ is not high and<br>$c_c$ is low and<br>$\varepsilon_{\text{peak}}$ is negative high and<br>$\gamma_{\text{peak}}$ is not very high                  | $\Delta c_c$ is positive |
| 12 | $c_b$ is not high and<br>$c_c$ is low and<br>$\varepsilon_{\text{peak}}$ is negative medium and<br>$\gamma_{\text{peak}}$ is not very high                | $\Delta c_c$ is positive |
| 13 | $c_c$ is not low and<br>$\varepsilon_{\text{peak}}$ is negative high and<br>$\gamma_{\text{peak}}$ is not very high                                       | $\Delta c_c$ is positive |
| 14 | $c_c$ is not low and<br>$\varepsilon_{\text{peak}}$ is negative medium and<br>$\gamma_{\text{peak}}$ is not very high                                     | $\Delta c_c$ is positive |
| 15 | $c_c$ is not low and<br>$c_v$ is not low and<br>$s_b$ is not low and<br>$\varepsilon_{\text{eff}}$ is negative medium and<br>$\gamma_{\text{eff}}$ is low | $\Delta c_w$ is positive |
| 16 | $c_c$ is not low and<br>$c_v$ is not low and<br>$s_b$ is not low and                                                                                      | $\Delta c_c$ is negative |

|    |                                                                                                                                                                            |                          |
|----|----------------------------------------------------------------------------------------------------------------------------------------------------------------------------|--------------------------|
|    | $\varepsilon_{\text{peak}}$ is negative medium and<br>$\gamma_{\text{peak}}$ is low                                                                                        |                          |
| 17 | $c_c$ is not low and<br>$c_v$ is not low and<br>$s_b$ is not low and<br>$\varepsilon_{\text{eff}}$ is negative high and<br>$\gamma_{\text{eff}}$ is low                    | $\Delta c_w$ is positive |
| 18 | $c_c$ is not low and<br>$c_v$ is not low and<br>$s_b$ is not low and<br>$\varepsilon_{\text{peak}}$ is negative high and<br>$\gamma_{\text{peak}}$ is low                  | $\Delta c_c$ is negative |
| 19 | $c_c$ is not low and<br>$c_v$ is not low and<br>$s_b$ is not low and<br>$\varepsilon_{\text{eff}}$ is negative high and<br>$\gamma_{\text{eff}}$ is medium                 | $\Delta c_w$ is positive |
| 20 | $c_c$ is not low and<br>$c_v$ is not low and<br>$s_b$ is not low and<br>$\varepsilon_{\text{peak}}$ is negative high and<br>$\gamma_{\text{peak}}$ is medium               | $\Delta c_c$ is negative |
| 21 | $c_c$ is not low and<br>$c_v$ is not low and<br>$s_b$ is not low and<br>$\varepsilon_{\text{eff}}$ is negative medium and<br>$\gamma_{\text{eff}}$ is medium               | $\Delta c_w$ is positive |
| 22 | $c_c$ is not low and<br>$c_v$ is not low and<br>$s_b$ is not low and<br>$\varepsilon_{\text{peak}}$ is negative medium and<br>$\gamma_{\text{peak}}$ is medium             | $\Delta c_c$ is negative |
| 23 | $c_c$ is low and<br>$c_v$ is not low and<br>$c_b$ is high and<br>$s_b$ is high and<br>$\varepsilon_{\text{eff}}$ is negative medium and<br>$\gamma_{\text{eff}}$ is medium | $\Delta c_w$ is positive |
| 24 | $c_c$ is low and                                                                                                                                                           | $\Delta c_c$ is negative |

|    |                                                                                                                                                                           |                          |
|----|---------------------------------------------------------------------------------------------------------------------------------------------------------------------------|--------------------------|
|    | $c_v$ is not low and<br>$c_b$ is high and<br>$s_b$ is high and<br>$\varepsilon_{\text{peak}}$ is negative medium and<br>$\gamma_{\text{peak}}$ is medium                  |                          |
| 25 | $c_c$ is low and<br>$c_v$ is not low and<br>$c_b$ is high and<br>$s_b$ is high and<br>$\varepsilon_{\text{eff}}$ is negative medium and<br>$\gamma_{\text{eff}}$ is low   | $\Delta c_w$ is positive |
| 26 | $c_c$ is low and<br>$c_v$ is not low and<br>$c_b$ is high and<br>$s_b$ is high and<br>$\varepsilon_{\text{peak}}$ is negative medium and<br>$\gamma_{\text{peak}}$ is low | $\Delta c_c$ is negative |
| 27 | $\varepsilon_{\text{eff}}$ is about zero and<br>$\gamma_{\text{eff}}$ is very low                                                                                         | $\Delta c_w$ is negative |

Note that Rule 27 (bone resorption due to understimulation) is evaluated separately from the other rules as a post-processing step in order to determine resorption rates for both woven and lamellar bone (for implementation details, please refer to the main text as well as [Frank Niemeyer's PhD thesis](#) [pages 329 and 330; DOI: 10.18725/OPARU-2961]).

## Membership functions

The fuzzy sets the linguistic rules refer to are defined as the following trapezoidal membership functions:

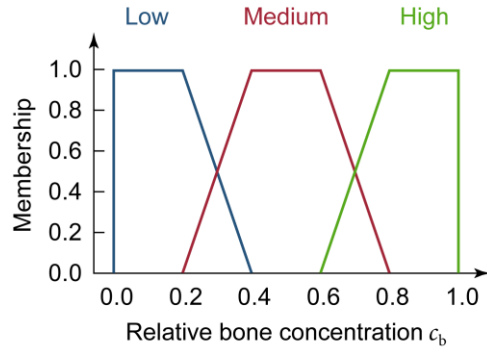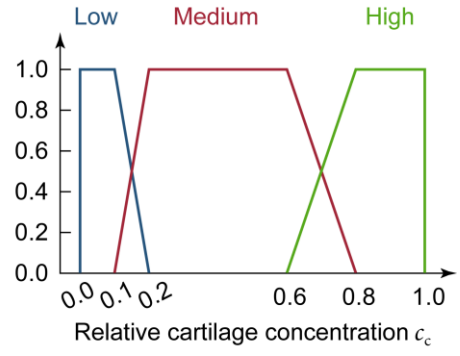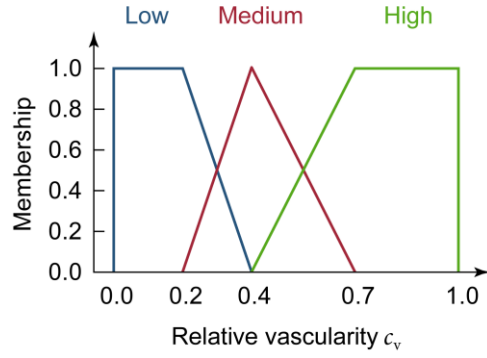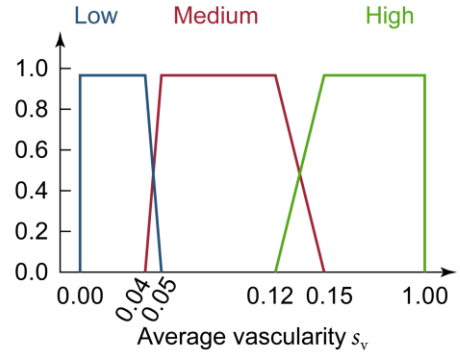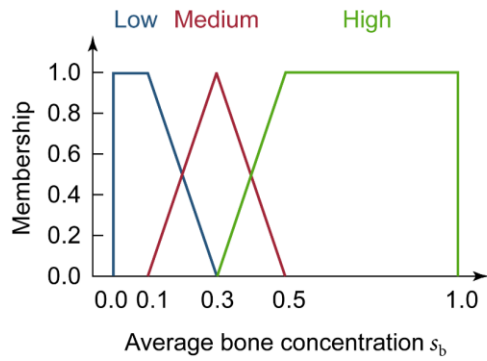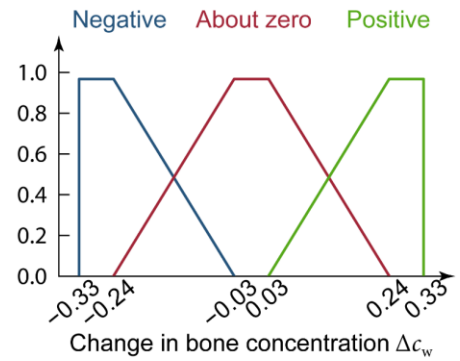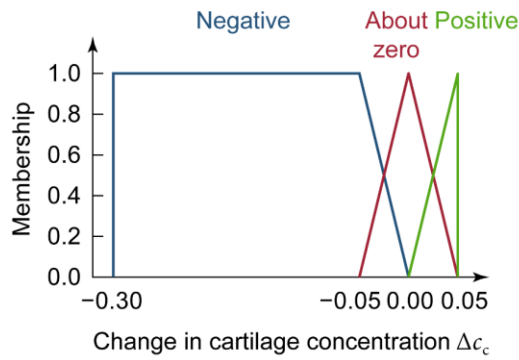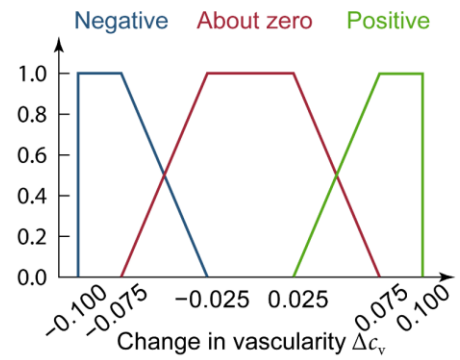

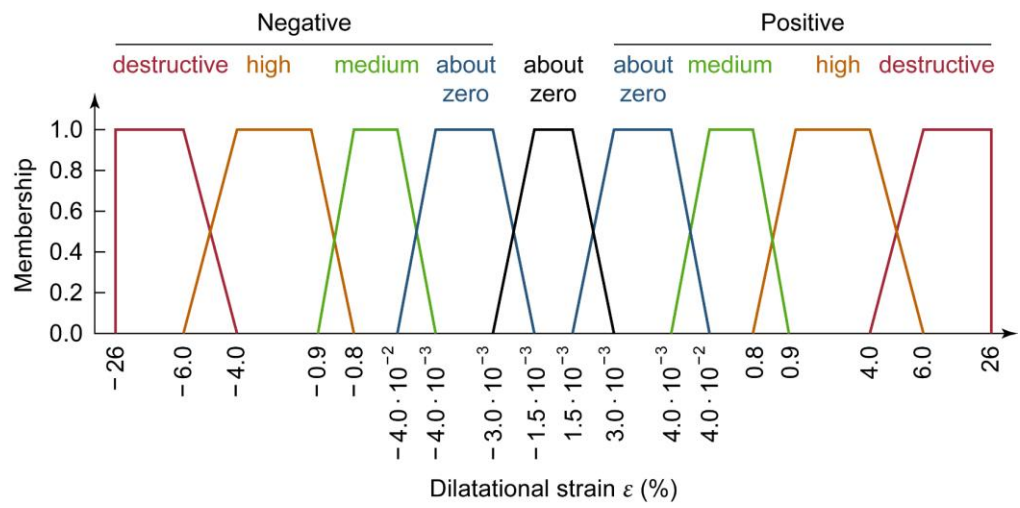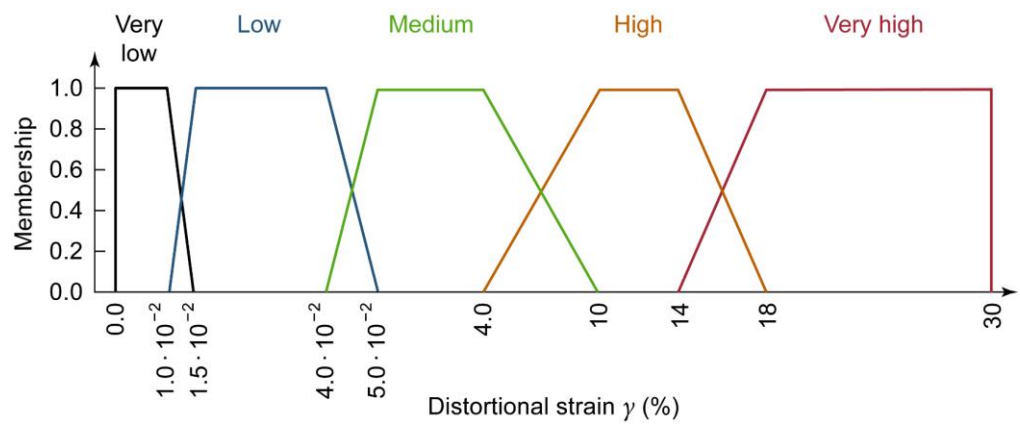

Supplement: S1 (10.1371/journal.pone.0194500.s001) [file journal.pone.0194500.s001]
